# Supplementary material for: Simultaneous electrochemical detection of dopamine and epinephrine in the presence of ascorbic acid and uric acid using a AgNPs–penicillamine–Au electrode
Source: Royal Society of Chemistry journal article supplement (doi:10.1039/c6ra19813a), 2016-01-01
Supplement: c6ra19813a1.pdf [file c6ra19813a1.pdf]

RSC Advances

Electronic supplementary Information

**Simultaneous electrochemical detection of dopamine and epinephrine in presence of ascorbic acid and uric acid using AgNPs-penicillamine-Au electrode**

Koushik Barman and Sk Jasimuddin

Department of Chemistry, Assam University, Silchar, Assam-788011, India

E-mail: [sk.jasimuddin@aus.ac.in](mailto:sk.jasimuddin@aus.ac.in)

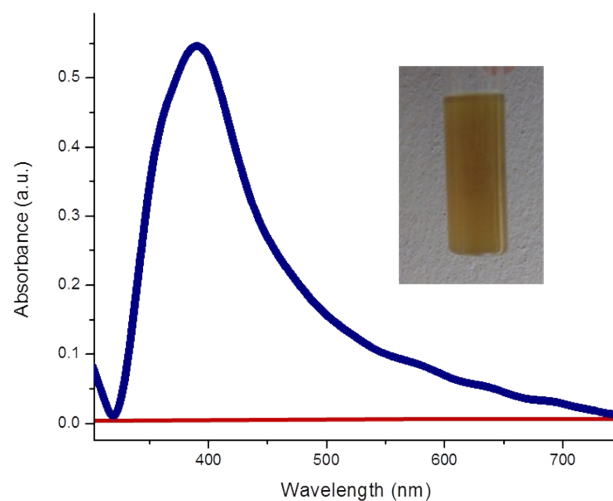

**Figure S1** UV-Vis spectra of PVP stabilized AgNPs. [Blue line:  $\text{AgNO}_3$  + PVP + Ascorbic acid + EtOH; Red line:  $\text{AgNO}_3$  + PVP + EtOH]

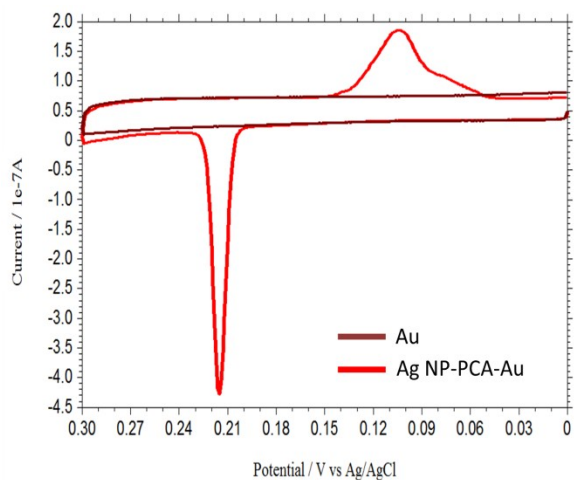

**Figure S2** Cyclic voltammograms obtained at bare and AgNPs-PCA modified gold electrode in 0.1 M PBS (pH 7.0)

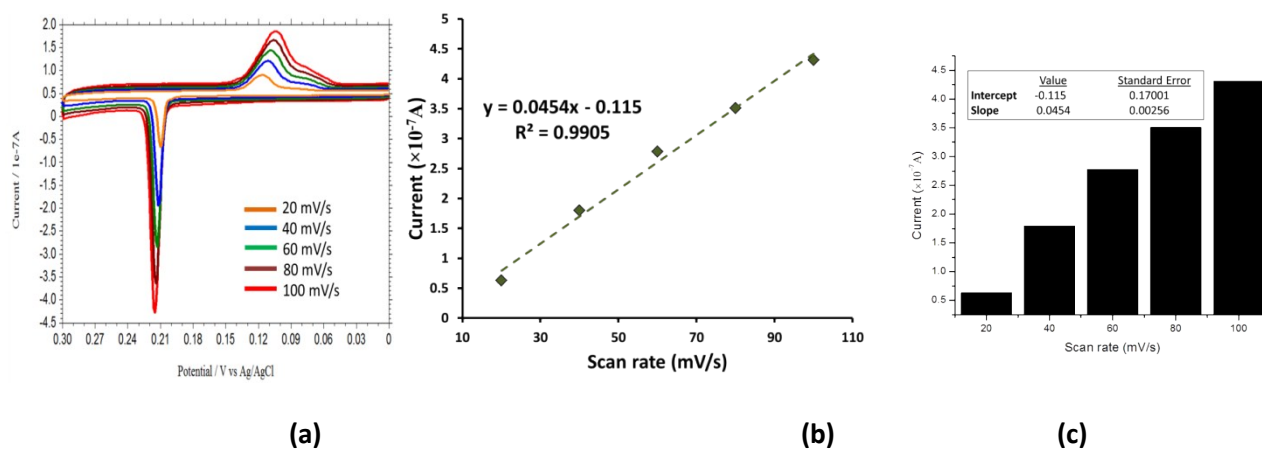

**Figure S3** Overlaid cyclic voltammograms obtained with increasing scan rate at AgNPs-PCA-Au electrode in 0.1 M PBS (pH 7.0) (a). Plot of current as a function of scan rate with a linear trend line ( $R^2 > 0.99$ ) (b), Bar diagram of current versus scan rate (c).

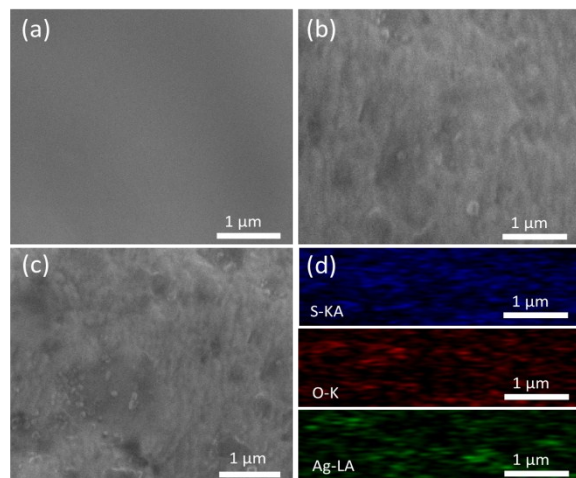

**Figure S4** SEM images of bare (a), PCA modified (b) AgNP-PCA modified gold electrode (c) and elemental mapping of AgNPs-PCA modified gold electrode

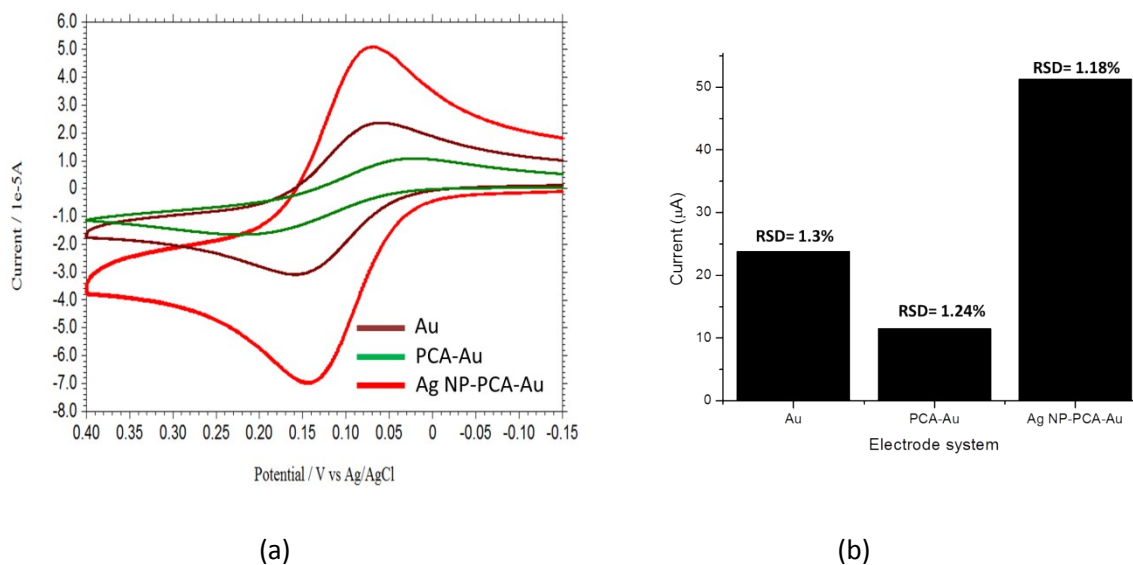

**Figure S5** Cyclic voltammograms of 0.5 mM  $K_4[Fe(CN)_6]$  in 0.1 M PBS at pH 7.0 using different working electrode (bare Au, PCA-Au and AgNPs-PCA-Au electrode)(a). Bar diagram of cathodic peak current at different electrode system, (b) Five times measurement ( $n = 5$ ) were taken.

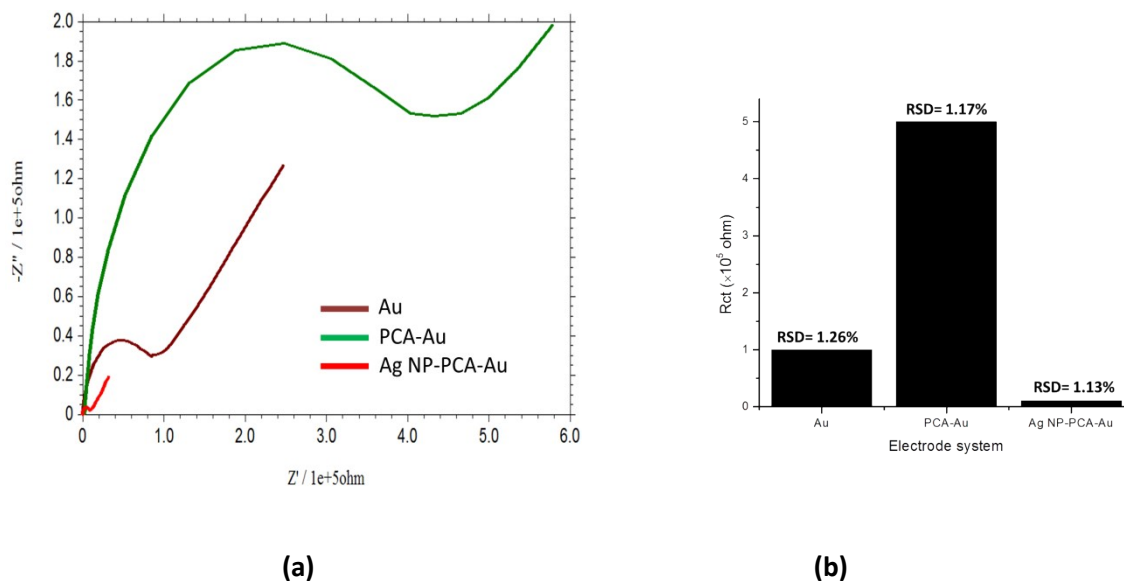

**Figure S6** Nyquist plot ( $-Z''$  versus  $Z'$ ) of 0.5 mM  $K_4[Fe(CN)_6]$  in 0.1 M PBS at pH 7.0 using different working electrode (bare Au, PCA-Au and AgNPs-PCA-Au electrode) (a). Bar diagram of  $R_{ct}$  values at different electrode system, (b) Five times measurement ( $n = 5$ ) were taken.

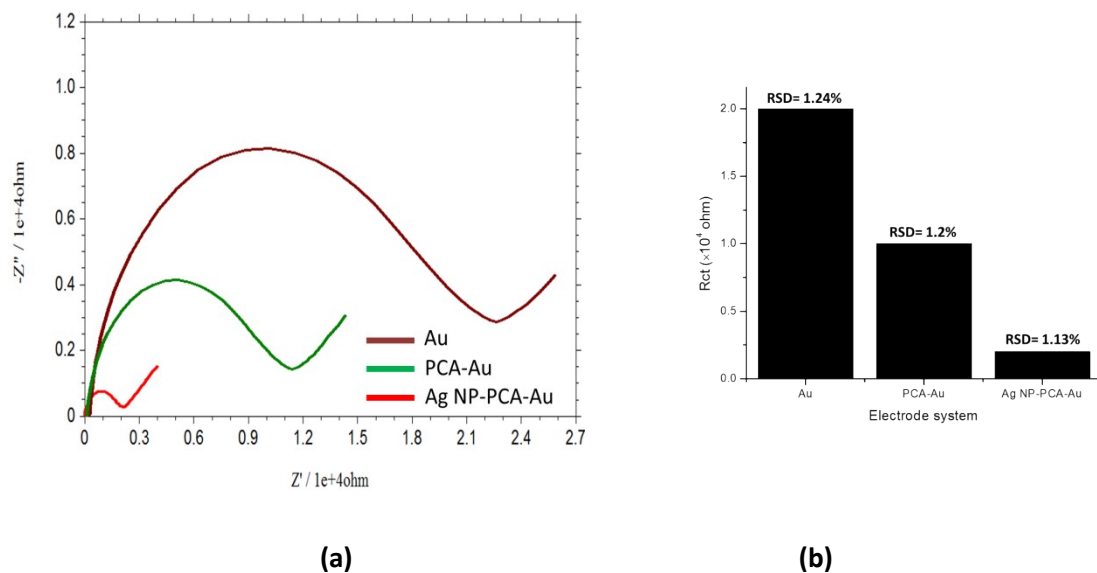

**Figure S7** Nyquist plot of 10  $\mu$ M DA in 0.1 M PBS at pH 7.0 using bare Au, PCA-Au and AgNPs-PCA-Au electrode (a). Bar diagram of  $R_{ct}$  values at different electrode system (b), Five times measurement ( $n = 5$ ) were taken.

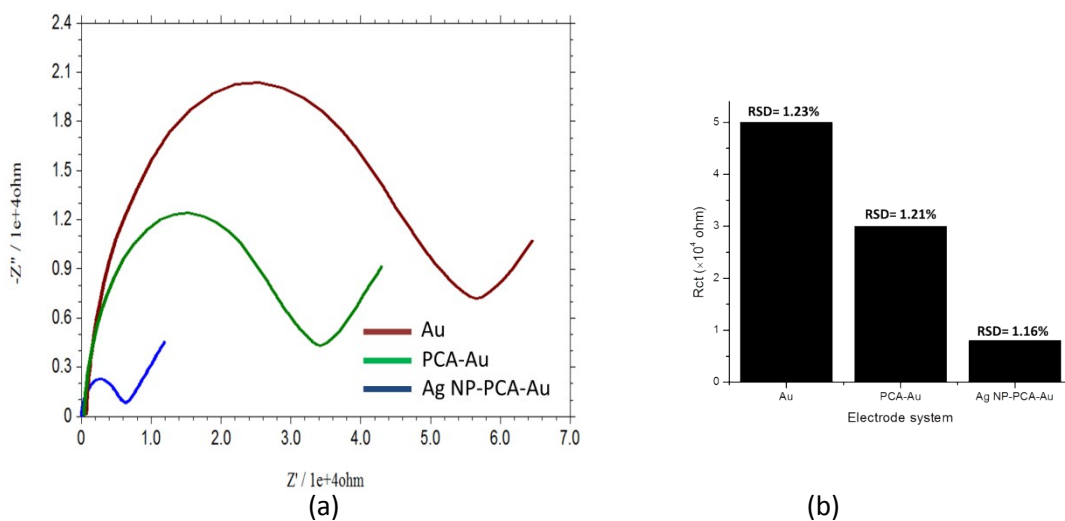

**Figure S8** Nyquist plot of 10  $\mu$ M EP in 0.1 M PBS at pH 7.0 using bare Au, PCA-Au and AgNPs-PCA-Au electrode (a). Bar diagram of  $R_{ct}$  values at different electrode system (b), Five times measurement ( $n = 5$ ) were taken.

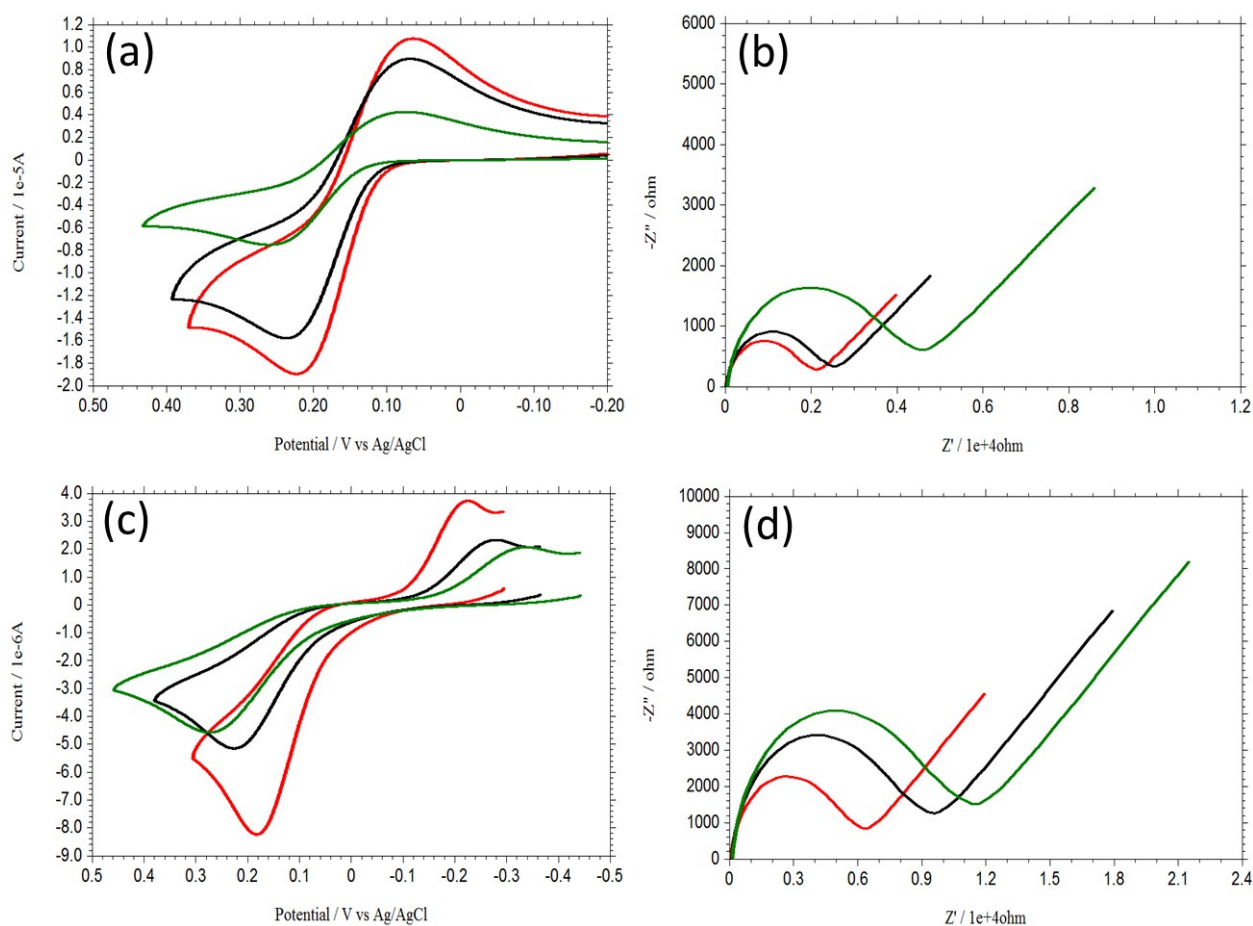

**Figure S9** Cyclic voltammogram of 10 μM DA (a) and 10 μM EP (c) in 0.1 M PBS (pH 7.0) at AgNPs (4 nm)-PCA (red curve), AgNPs (10 nm)-PCA (black curve) and AgNPs (20 nm)-PCA (green curve) modified gold electrodes.

Nyquist plot of 10 μM DA (b) in 0.1 M PBS (pH 7.0) using different sized AgNPs modified gold electrodes.  $E_{ac} = 10$  mV, frequency range: 0.01 – 100000 Hz [AgNPs (4 nm)-PCA-Au (red curve),  $R_{ct} = 0.20 \times 10^4 \Omega$ ; AgNPs (10 nm)-PCA-Au (black curve),  $R_{ct} = 0.25 \times 10^4 \Omega$ ; and AgNPs (20 nm)-PCA-Au (green curve),  $R_{ct} = 0.45 \times 10^4 \Omega$ ].

Nyquist plot of 10 μM EP (d) in 0.1 M PBS (pH 7.0) using different sized AgNPs modified gold electrodes.  $E_{ac} = 10$  mV, frequency range: 0.01 – 100000 Hz [AgNPs (4 nm)-PCA-Au (red curve),  $R_{ct} = 0.6 \times 10^4 \Omega$ ; AgNPs (10 nm)-PCA-Au (black curve),  $R_{ct} = 0.9 \times 10^4 \Omega$ ; and AgNPs (20 nm)-PCA-Au (green curve),  $R_{ct} = 1.2 \times 10^4 \Omega$ ].

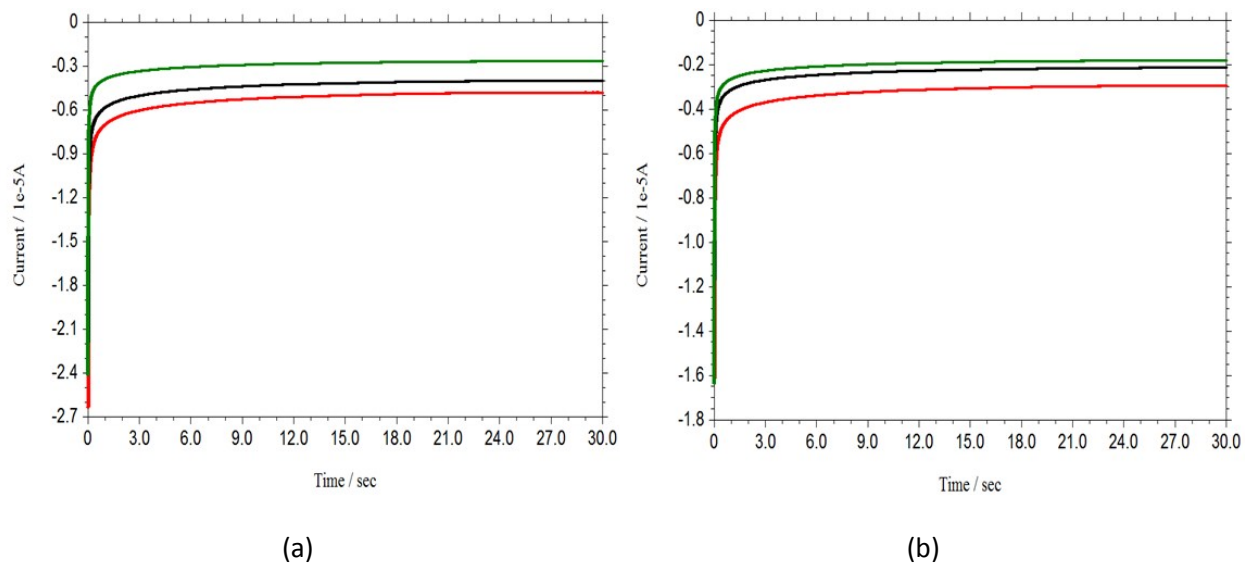

**Figure S10** Chronoamperograms of 10  $\mu\text{M}$  DA (a) and 10  $\mu\text{M}$  EP (b) in 0.1 M PBS (pH 7.0) at +0.22 V and +0.18 V versus Ag/AgCl, respectively using AgNPs (4 nm)-PCA (red curve), AgNPs (10 nm) -PCA (black curve) and AgNPs (20 nm) -PCA (green curve) modified gold electrodes. In both cases (DA and EP) resulting current decreases with increasing size of the AgNPs,  $I = 0.5$  to  $0.3 \times 10^{-5}$  A for DA and  $I = 0.3$  to  $0.15 \times 10^{-5}$  A for EP at 30 seconds and the results supports that the electrochemical sensing behavior decreases with increasing size of the silver nanoparticles.

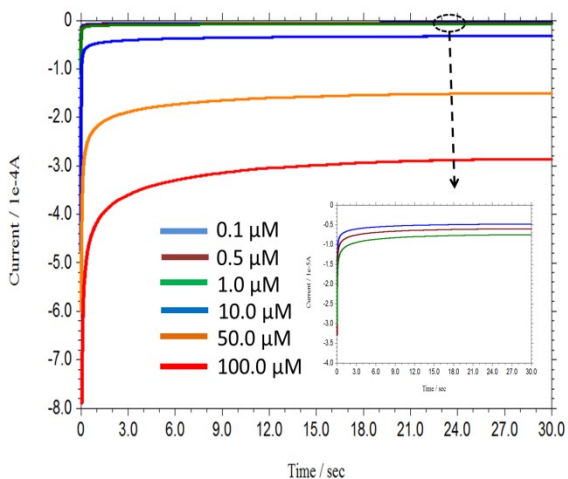

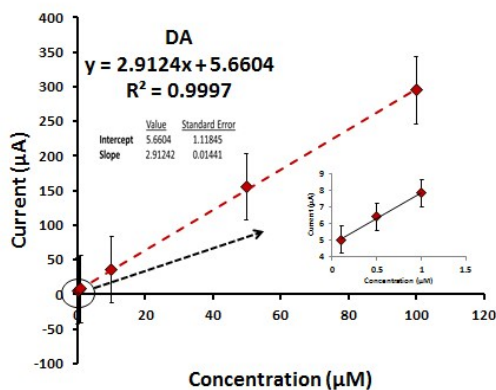

(a)

(b)

**Figure S11** Chronoamperograms with increasing concentration of DA (0.1 to 100.0 mM) in 0.1 M PBS (pH 7.0) using AgNPs-PCA-Au electrode at +0.22 V versus Ag/AgCl, LOD = 0.2 nM (S/N = 3) (a). Plot of resulting current in chronoamperometry at 30 seconds versus concentration of DA (b), Five times measurement were taken (n = 5).

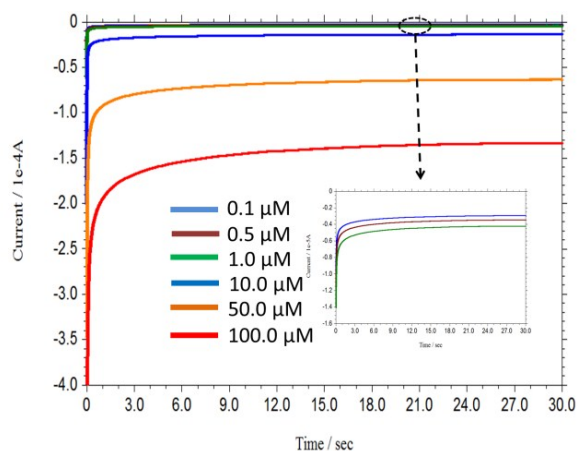

(a)

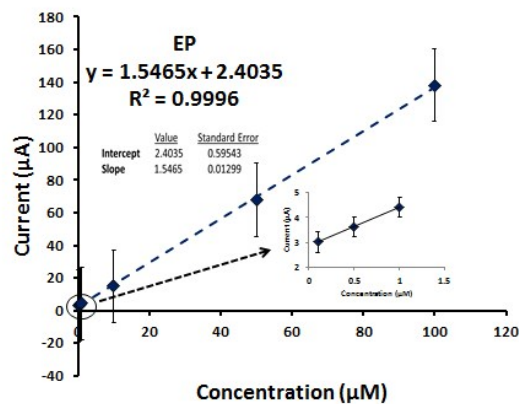

(b)

**Figure S12** Chronoamperograms with increasing concentration of EP (0.1 to 100.0 mM) in 0.1 M PBS (pH 7.0) using AgNPs-PCA-Au electrode at +0.18 V versus Ag/AgCl, LOD = 0.5 nM (S/N = 3) (a). Plot of resulting current in chronoamperometry at 30 seconds versus concentration of EP (b), Five times measurement were taken (n = 5).



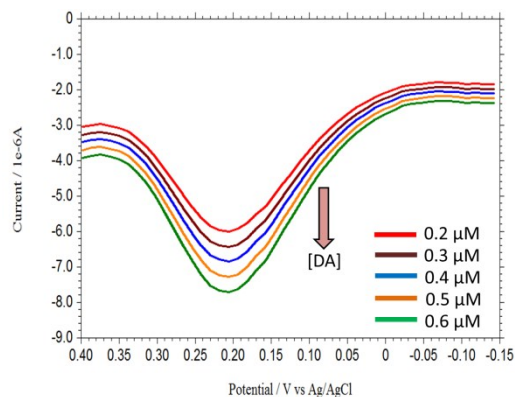

(a)

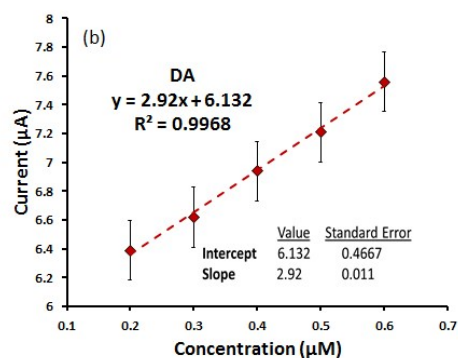

(b)

**Figure S13** Overlaid DPVs for each increment of 0.1  $\mu\text{M}$  DA at AgNPs-PCA-Au electrode in 0.1 M PBS solution at pH 7.0 (a). A plot of oxidation peak current *versus* increasing concentration of DA (b), Five times measurement were taken ( $n = 5$ ).

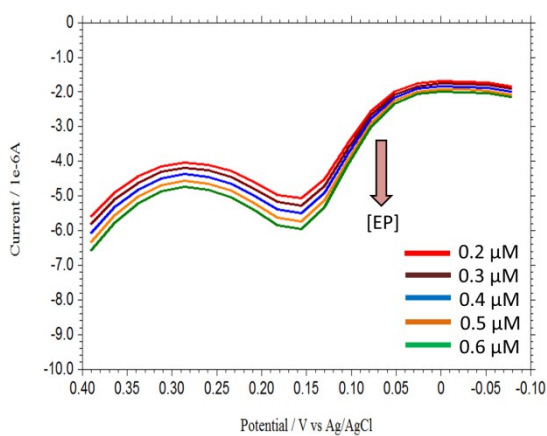

(a)

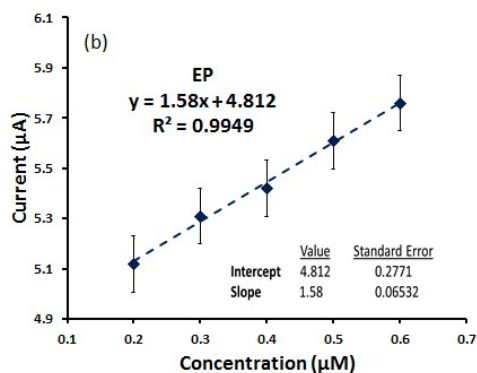

(b)

**Figure S14** Overlaid DPVs for each increment of 0.1  $\mu\text{M}$  EP at AgNPs-PCA-Au electrode in 0.1 M PBS solution at pH 7.0 (a). A plot of oxidation peak current *versus* increasing concentration of EP (b), Five times measurement were taken ( $n = 5$ ).

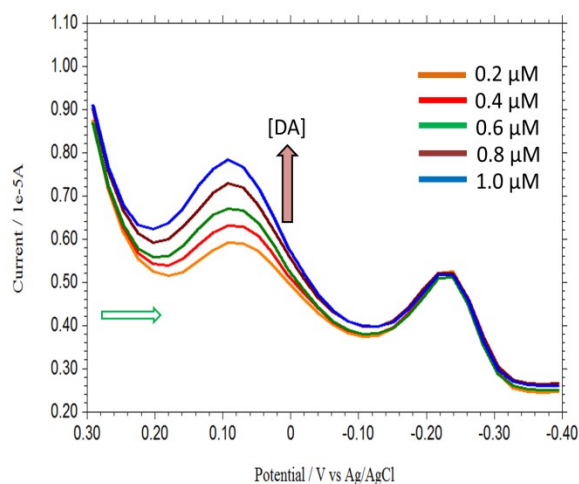

(a)

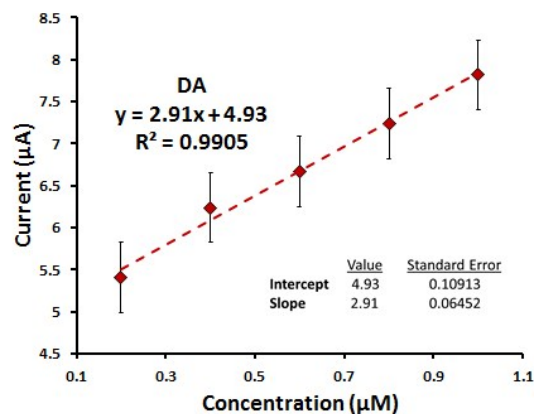

(b)

**Figure S15** Overlaid differential pulse voltammogram for each increment of 0.2  $\mu\text{M}$  DA to 0.2  $\mu\text{M}$  EP at AgNPs-PCA-Au electrode in 0.1 M PBS buffer solution at pH 7.0 (a). A plot of reduction peak current versus increasing concentration of DA (b), Five times measurement were taken ( $n = 5$ ).

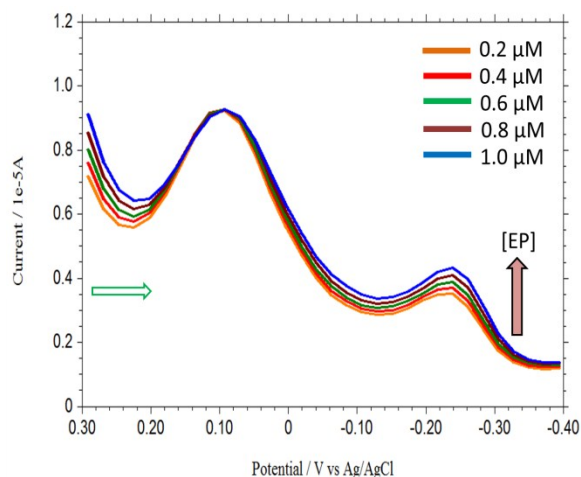

(a)

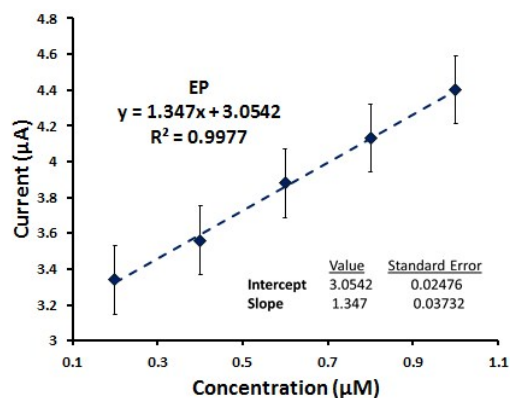

(b)

**Figure S16** Overlaid differential pulse voltammogram for each increment of 0.2  $\mu\text{M}$  EP to 0.2  $\mu\text{M}$  DA at AgNPs-PCA-Au electrode in 0.1 M PBS buffer solution at pH 7.0 (a). A plot of reduction peak current versus increasing concentration of EP (b), Five times measurement were taken ( $n = 5$ ).

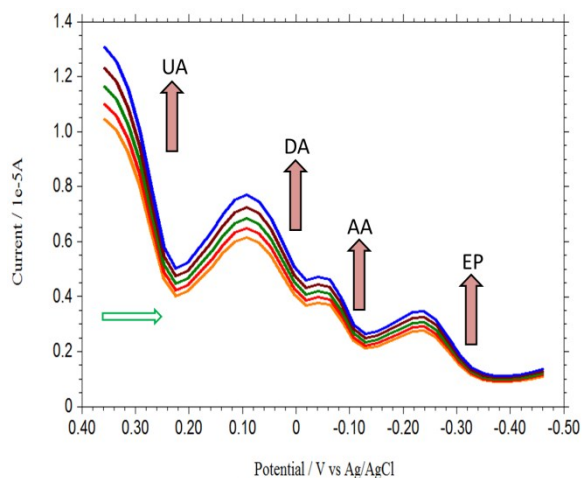

(a)

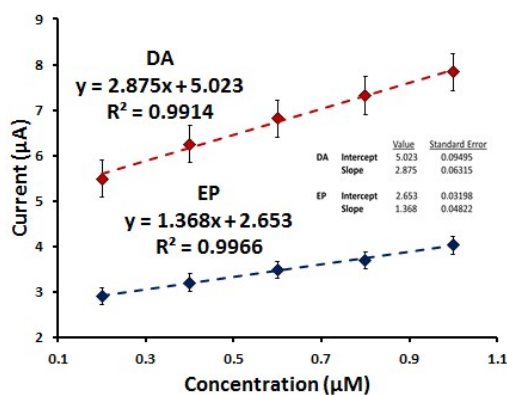

(b)

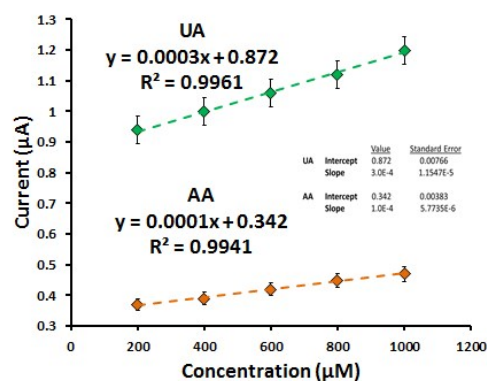

(c)

**Figure S17** Overlaid differential pulse voltammogram for simultaneous increment of DA, EP, AA and UA at AgNPs-PCA-Au electrode in 0.1 M PBS buffer solution at pH 7.0 (a). Plot of reduction peak current *versus* increasing concentration of DA, EP, AA and UA (b and c), Five times measurement were taken in each case ( $n = 5$ ).

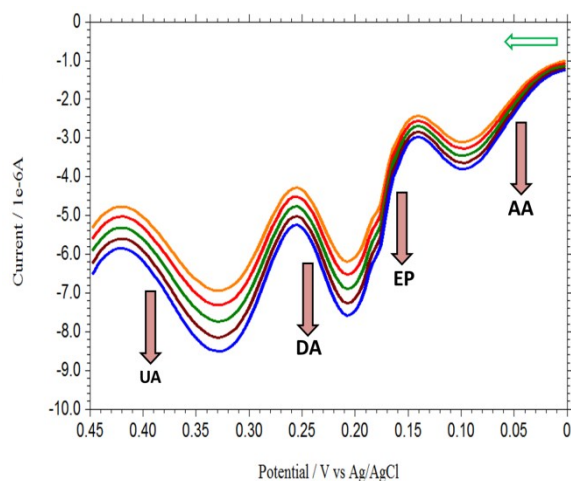

(a)

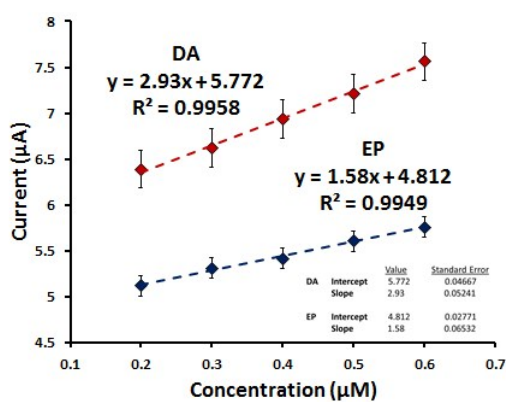

(b)

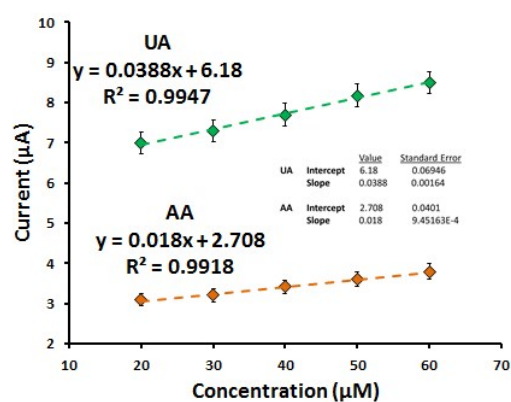

(c)

**Figure S18** Overlaid DPV for simultaneous increment of DA, EP, AA and UA at AgNPs-PCA-Au electrode in 0.1 M PBS buffer solution at pH 7.0 (a). Plot of oxidation peak current *versus* increasing concentration of DA, EP, AA and UA (b and c), Five times measurement were taken in each case ( $n = 5$ ).

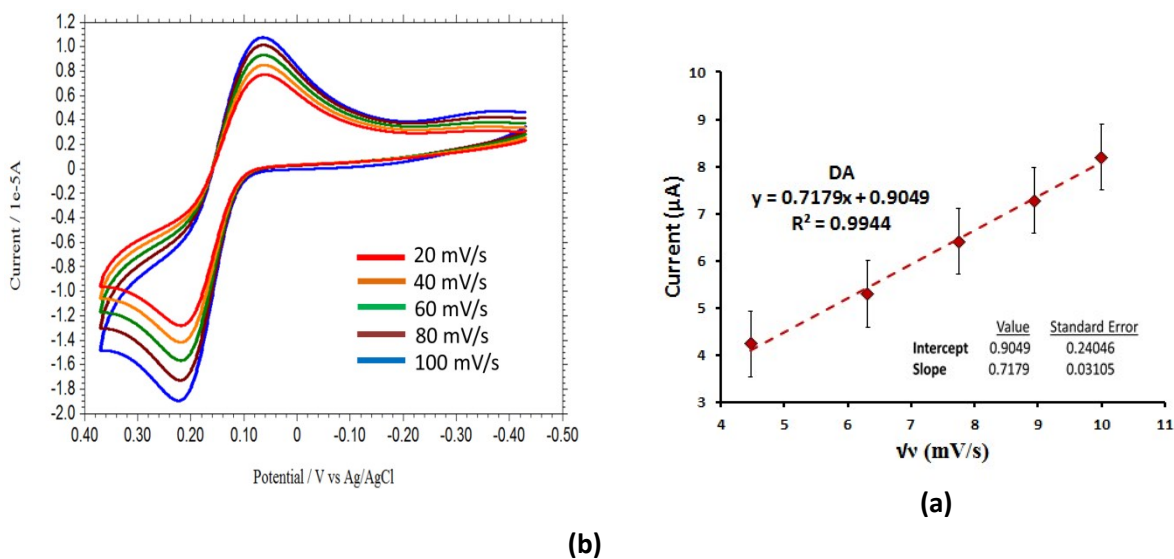

**Figure S19** Cyclic voltammograms of 10  $\mu\text{M}$  DA in 0.1 M PBS (pH 7.0) at different scan rate using AgNPs-PCA modified gold electrode (a). Plot of oxidation peak current *versus* square root of scan rate (b), Five times measurement were taken ( $n = 5$ ).

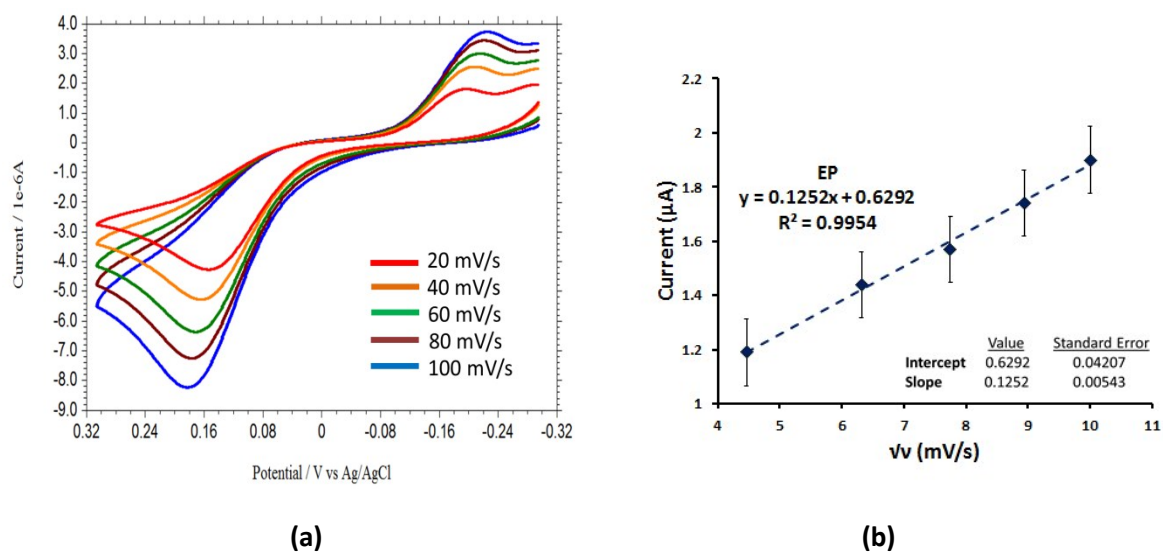

**Figure S20** Cyclic voltammograms of 10  $\mu\text{M}$  EP in 0.1 M PBS (pH 7.0) at different scan rate using AgNPs-PCA-Au electrode (a). Plot of oxidation peak current *versus* square root of scan rate (b), Five times measurement were taken ( $n = 5$ ).

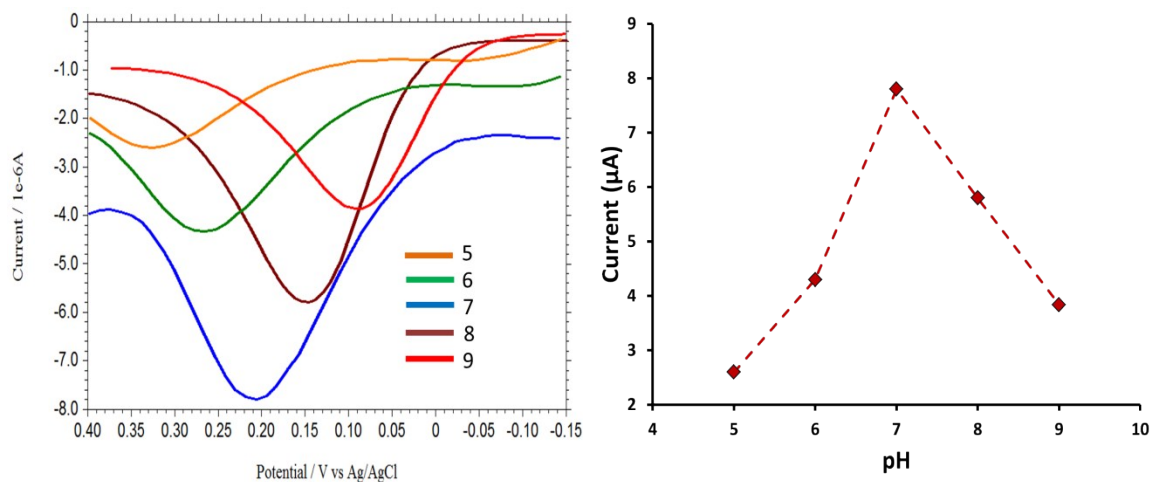

(a)

(b)

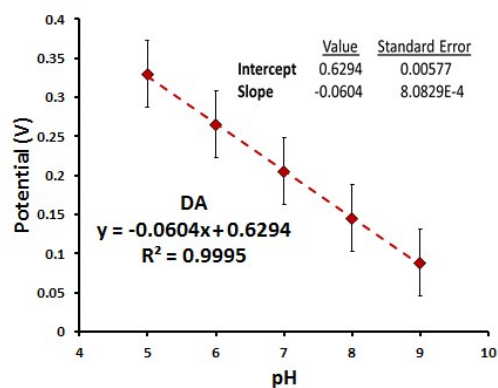

(c)

**Figure S21** DPVs of 0.6  $\mu\text{M}$  DA in 0.1 M PBS at different pH using AgNPs-PCA modified gold electrode (a), Plot of anodic peak current of 0.6  $\mu\text{M}$  DA versus pH(b), Plot of oxidation peak potential of 0.6  $\mu\text{M}$  DA versus pH(c), Five times measurement were taken( $n = 5$ ).

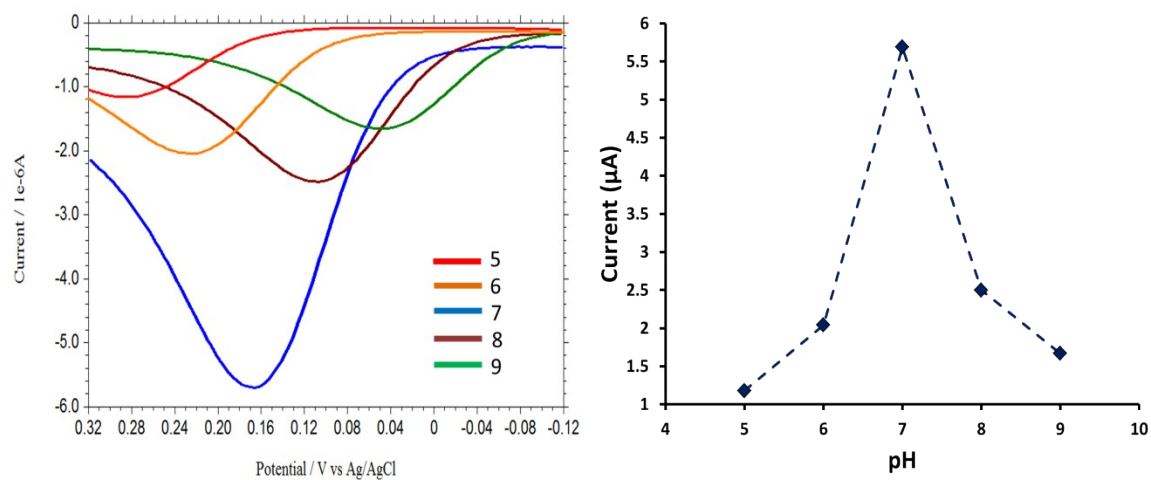

(a)

(b)

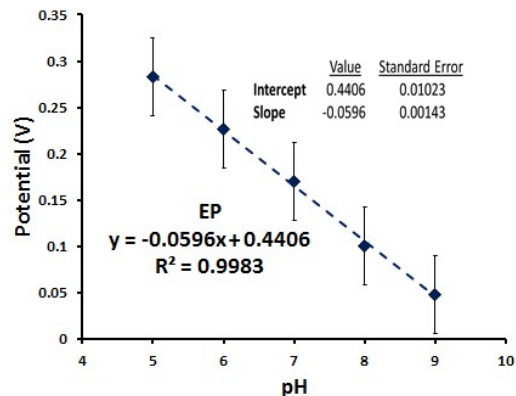

(c)

**Figure S22** DPVs of 0.6  $\mu\text{M}$  EP in 0.1 M PBS at different pH (5.0 - 9.0) using AgNPs-PCA modified gold electrode (a), Plot of anodic peak current of 0.6  $\mu\text{M}$  EP versus pH(b), Plot of oxidation peak potential of 0.6  $\mu\text{M}$  EP versus pH(c), Five times measurement were taken ( $n = 5$ ).

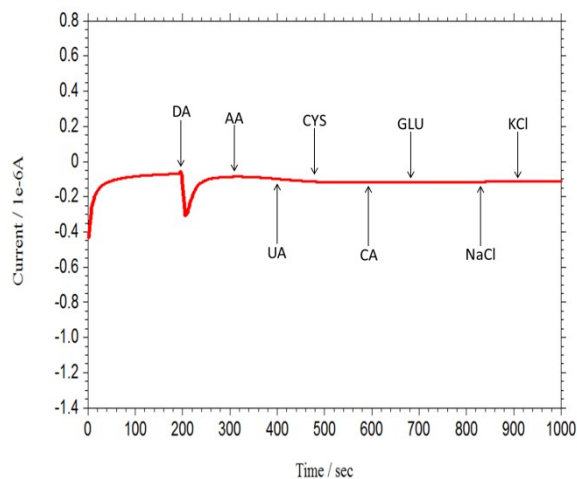

**Figure S23** Amperometric response at AgNPs-PCA-Au with an applied potential of + 0.22 V on subsequent addition of 0.01  $\mu\text{M}$  DA, 1.0  $\mu\text{M}$  AA, 1.0  $\mu\text{M}$  UA, 1.0  $\mu\text{M}$  Cys, 1.0  $\mu\text{M}$  CA, 1.0  $\mu\text{M}$  Glu, 1.0  $\mu\text{M}$  NaCl, 1.0  $\mu\text{M}$  KCl under stirring condition (Supporting electrolyte: 0.1 M PBS, pH 7.0).

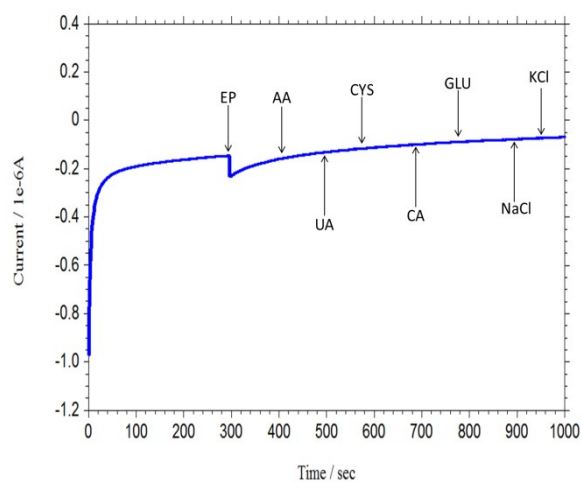

**Figure S24** Amperometric response at AgNPs-PCA-Au electrode with an applied potential of + 0.18 V on subsequent addition of 0.01  $\mu\text{M}$  EP, 1.0  $\mu\text{M}$  AA, 1.0  $\mu\text{M}$  UA, 1.0  $\mu\text{M}$  Cys, 1.0  $\mu\text{M}$  CA, 1.0  $\mu\text{M}$  Glu, 1.0  $\mu\text{M}$  NaCl, 1.0  $\mu\text{M}$  KCl under stirring condition (Supporting electrolyte: 0.1 M PBS, pH 7.0).



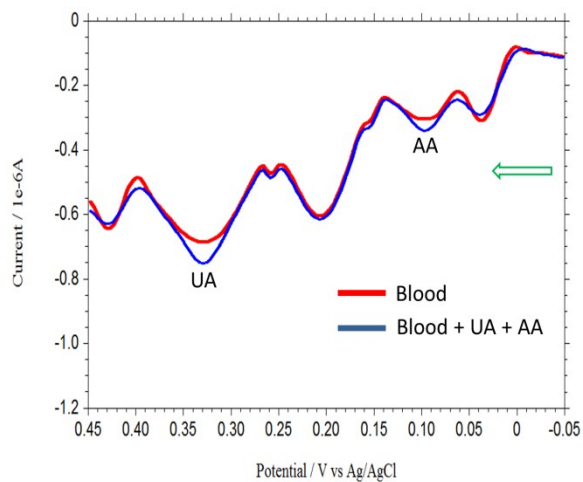

**Figure S25** Overlaid DPVs of human blood sample solution and after addition of standard UA and AA solution in blood sample solution.

**Table S1** Analytical data for the simultaneous determination of EP, DA, UA and AA at AgNPs-PCA-Au electrode

| Species | Linear regression equation  | Linear range<br>( $\mu\text{M}$ ) | Correlation<br>coefficient ( $R^2$ ) | Detection limit |
|---------|-----------------------------|-----------------------------------|--------------------------------------|-----------------|
| DA      | $I_{pa} = 2.93 C + 5.772$   | 0.2-0.5                           | 0.9958                               | 0.2 nM          |
| EP      | $I_{pa} = 1.58 C + 4.812$   |                                   | 0.9949                               | 0.5 nM          |
| UA      | $I_{pa} = 0.038 C + 6.180$  | 20-60                             | 0.9947                               |                 |
| AA      | $I_{pa} = 0.018 C + 2.708$  |                                   | 0.9918                               |                 |
| DA      | $I_{pc} = 2.875 C + 5.023$  | 0.2-1.0                           | 0.9914                               | 0.2 nM          |
| EP      | $I_{pc} = 1.368 C + 2.653$  |                                   | 0.9966                               | 0.5 nM          |
| UA      | $I_{pc} = 0.0003 C + 0.872$ | 200-1000                          | 0.9961                               |                 |
| AA      | $I_{pc} = 0.0001 C + 0.342$ |                                   | 0.9941                               |                 |

**Table S2** Comparative account of different electrochemical sensors for DA and EP sensing

| Sensor | DA | EP | Reference |
|--------|----|----|-----------|
|--------|----|----|-----------|

|                                     | Linear range<br>( $\mu\text{M}$ ) | Detection limit<br>( $\mu\text{M}$ ) | Linear range<br>( $\mu\text{M}$ ) | Detection limit<br>( $\mu\text{M}$ ) |              |
|-------------------------------------|-----------------------------------|--------------------------------------|-----------------------------------|--------------------------------------|--------------|
| DNA-Ppyox-CPE                       | 0.3 – 10.0                        | 0.08                                 | 0.5– 20                           | 0.06                                 | [1]          |
| $\alpha$ -CD-CNT-GCE                | 2.0-1000.0                        | 1.0                                  | 1.0-1000                          | 0.5                                  | [2]          |
| L-methionine-GCE                    | 1.0 -500.0                        | 0.42                                 | 0.5– 100                          | 0.36                                 | [3]          |
| Poly(caffeic)acid-GCE               | 1.0 – 35.0                        | 0.1                                  | 1.0 -35.0                         | 0.2                                  | [4]          |
| PLG-Ag-GCE                          | 5.0-100.0                         | 0.5                                  | 10.0-100.0                        | 0.8                                  | [5]          |
| Au/AuO-CMC-Pt                       | -                                 | 0.078                                | -                                 | 0.35                                 | [6]          |
| Polydopamine-nanogold composite-GCE | 1.0 – 80.0                        | 0.1                                  | 1.0 – 80.0                        | 0.08                                 | [7]          |
| NiONPs-MWCNT-DPH-GCE                | 0.07– 4.8                         | 0.05                                 | 0.37– 9.5                         | 0.082                                | [8]          |
| AgNPs-SiO <sub>2</sub> -GO-GCE      | -                                 | 0.26                                 | -                                 | 0.27                                 | [9]          |
| PCA-Au                              | 20 – 800.0                        | 4.0                                  | -                                 | -                                    | [10]         |
| PCA-Au                              | -                                 | -                                    | 5.0– 200                          | 0.13                                 | [11]         |
| AgNPs-PCA-Au                        | 0.1-100.0                         | 0.0002                               | 0.1-100                           | 0.0005                               | Present work |

Ppyox: overoxidized polypyrrole;  $\alpha$ -CD:  $\alpha$ -cyclodextrin; PLG-Ag: Silver doped poly(L-glutamic acid); CMC: carboxylated multi-walled carbon nanotubes; GO: graphene oxide; DPH: dihexadecylphosphate; PCA: Penicillamine

## References

1. X. Jiang and X. Lin, *Analyst*, 2005, **130**, 391.
2. G. Y. Wang, X. J. Liu, G. A. Luo and Z. H. Wang, *Chin. J. Chem.*, 2005, **23**, 297.
3. W. Ma and D. M. Sun, *Russian J. Electrochem.*, 2007, **43**, 1382.
4. N. B. Li, W. Ren and H. Q. Luo, *Electroanalysis*, 2007, **19**, 1496.
5. W. Hu, D. Sun and W. Ma, *Chem. Anal. (Warsaw)*, 2008, **53**, 703.
6. A. S. Adekunle, J. G. Ayenimo, X. -Y. Fang, W. O. Doherty, O. A. Arotiba and B. B. Mamba, *Int. J. Electrochem. Sci.*, 2011, **6**, 2826.
7. Y. Zhang, W. Ren and S. Zhang, *Int. J. Electrochem. Sci.*, 2013, **8**, 6839.
8. L. C. S. Figueiredo-Filho, T. A. Silva, F. C. Vicentini and O. F. Filho, *Analyst*, 2014, **139**, 2842.
9. F. H. Cincotto, T. C. Canevari, A. M. Campos, R. Landers and S. A. S. Machado, *Analyst*, 2014, **139**, 4634.
10. Q. Wang, D. Dong and N. Li, *Bioelectrochemistry*, 2001, **54**, 169.
11. L. M. Niu, H. Q. Luo and N. B. Li, *Microchim. Acta*, 2005, **150**, 87.
